# Supplementary material for: Electrochemically stimulated drug release from dual stimuli responsive chitin hydrogel
Source: Royal Society of Chemistry journal article supplement (doi:10.1039/c3tb00517h), 2013-01-01
Supplement: c3tb00517h.pdf [file c3tb00517h.pdf]

Supplementary Information for

## Electrochemically stimulated drug release from dual stimuli responsive chitin hydrogel

Fuyuan Ding<sup>1</sup>, Xiaowen Shi<sup>1\*</sup>, Zhiwei Jiang<sup>2</sup>, Li Liu<sup>1</sup>, Jie Cai<sup>2</sup>, Zeyong Li<sup>2</sup>, Si Chen<sup>2</sup>, Yumin Du<sup>1</sup>

1. Department of Environmental Science, College of Resource and Environmental Science, Wuhan University, Wuhan 430072, China

2. Department of Chemistry, Wuhan University, Wuhan 430072, China

\* Corresponding author, +86-27-68778501, shixwwhu@163.com

### 1. Materials

BSA was purchased from Sigma. Ferrous ammonium sulfate, phenanthroline, hydroxylamine hydrochloride were purchased from Shanghai Reagent Co., Ltd (China). Dulbecco's Modified Eagle's Medium (DMEM), penicillin–streptomycin, fetal bovine serum (FBS), 3-(4,5-dimethylthiazol-2-yl)-2,5-diphenyltetrazolium bromide (MTT) were purchased from Invitrogen Corp. All other reagents were of analytical grade and were used without further purification.

### 2. The amount of Fe<sup>3+</sup> in the hydrogel

To determine the amount of Fe<sup>3+</sup> in the hydrogel, phenanthroline spectrophotometric method was used<sup>1, 2</sup>. Briefly, the electrodeposited hydrogel on the platinum foil was dissolved in 10 mL 0.1 M Na<sub>2</sub>SO<sub>4</sub> containing sodium erythorbate (10 mM). Then, 10 mL of sample solution, 5.0 mL of HAC/NaAc (pH=4.6), 2.5 mL of hydroxylamine hydrochloride (1%), 5.0 mL of phenanthroline (0.1%) were added into a 50 mL volumetric flask. Ultrapure water was added to the scale. The volumetric flask was shaken to mixing the solution. The final solution was put still for 10min before test. The Fe<sup>3+</sup> concentration in the solution was recorded on a UNICO UV-2000 Spectrophotometer at 510 nm. The solution without Fe<sup>3+</sup> was used as control. Ferrous ammonium sulfate was used for calibrating the Fe<sup>3+</sup> analysis.

### 3. The amount of BSA in the hydrogel

The amount of BSA loaded in the acrylamide-modified chitin hydrogel electrodeposited on titanium plate or on platinum foil was measured by spectrophotometric method. Briefly, the acrylamide-modified chitin hydrogel was dissolved in 10 mL 100 mM Na<sub>2</sub>SO<sub>4</sub>, pH 7.0 (adjusted by 1%NaOH) solution at room temperature. In the case of Fe<sup>3+</sup> crosslinked hydrogel electrodeposited on platinum foil, the hydrogel was dissolved in 10 mL 0.1 M Na<sub>2</sub>SO<sub>4</sub> containing sodium erythorbate (10 mM). The BSA concentrations in

the solutions were recorded on a UNICO UV-2000 Spectrophotometer at 280nm. A blank acrylamide-modified chitin gel dissolved in 10 mL 100 mM  $\text{Na}_2\text{SO}_4$  was used as a control. Protein standard was used for calibrating the BSA analysis.

#### 4. SEM of the hydrogel

Scanning electron microscopy (SEM) observation was carried out on a TESCAN VEGA 3 LMU microscope. The hydrogels were frozen in liquid nitrogen, freeze-dried, coated with gold and analyzed.

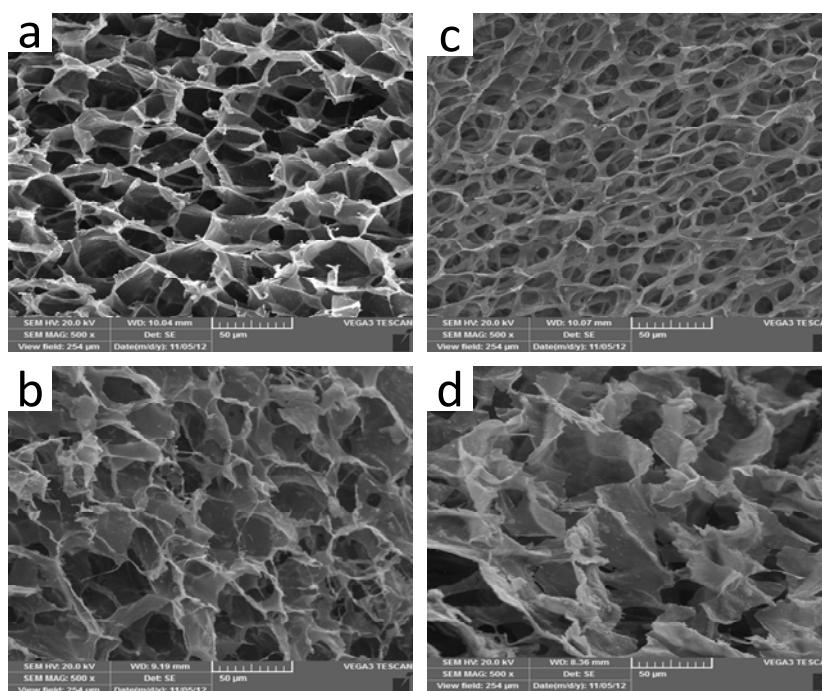

Fig.S1 SEM images of iron(III)-crosslinked acrylamide-modified chitin hydrogel after freeze-drying with a magnification of  $500\times$ , surface (a) and cross-section (b), SEM images of the acrylamide-modified chitin hydrogel after freeze-drying with a magnification of  $500\times$ , surface (c) and cross-section (d)

#### 5. Cytotoxicity assay

COS7 cells were used to evaluate the cytotoxicities of AMC4,  $\text{Fe}^{3+}$  crosslinked hydrogel and pH sensitive hydrogel by MTT assay. Briefly, the cells were seeded in a 96-well plate at a density of 6000 cells per well and incubated in 100 mL DMEM containing 10% FBS for 24 h. Then, sample solutions were added to the media. In the case of  $\text{Fe}^{3+}$  crosslinked hydrogel and pH sensitive hydrogel, the released solutions were chosen to evaluate the cytotoxicities. The concentrations of the samples were 23.41, 35.12, 52.67, 79.01, 118.52  $\text{mg L}^{-1}$ . After 48 h, 20  $\mu\text{L}$  MTT ( 5  $\text{mg mL}^{-1}$  ) solution was added to each well and further cultured for 4 h. After that, the medium was removed and replaced with 150 mL DMSO. The absorbance was measured at a

wavelength of 570 nm by a microplate reader (Bio-Rad, Model 550, USA) to determine the cell viability. The relative cell viability (%) was calculated by  $(OD_{570_{\text{sample}}}/OD_{570_{\text{control}}}) \times 100$ , where  $OD_{570_{\text{control}}}$  was obtained in the absence of samples and  $OD_{570_{\text{sample}}}$  was obtained after co-incubation with the samples<sup>3, 4</sup>.

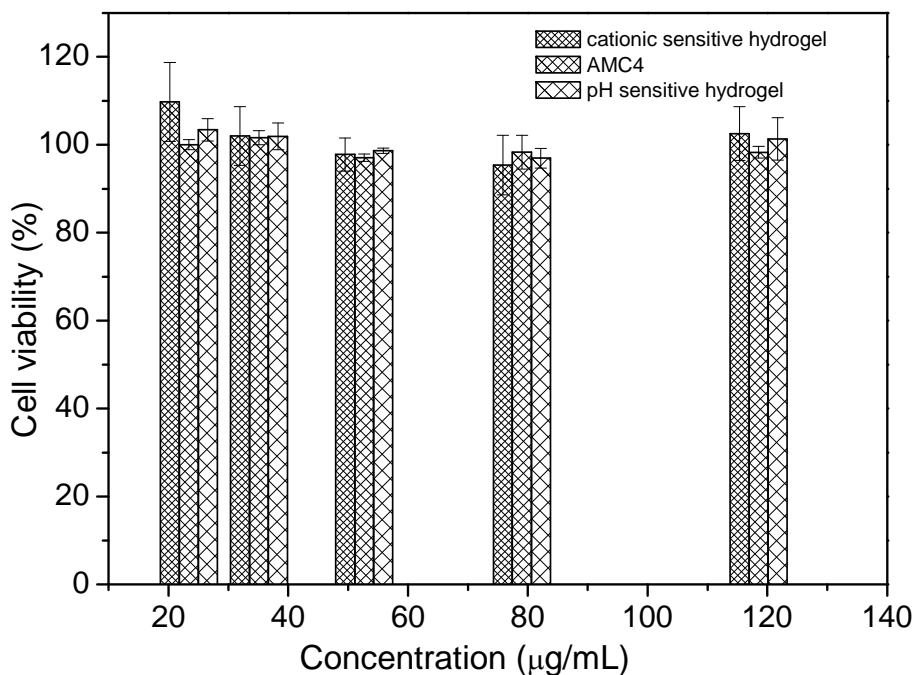

Fig.S2 Cell viabilities of released solutions from Fe<sup>3+</sup> crosslinked hydrogel and pH sensitive hydrogel and the AMC4 using COS7 cells.

## References

1. Z. Jin, G. Güven, V. Bocharova, J. Halánek, I. Tokarev, S. Minko, A. Melman, D. Mandler and E. Katz, *ACS Applied Materials & Interfaces*, 2012, **4**, 466-475.
2. D. A. Skoog, D. M. West and F. J. Holler, *Analytical chemistry: an introduction*, Saunders College Pub., 2000.
3. J. Yang, Q. Lei, K. Han, Y.-H. Gong, S. Chen, H. Cheng, S.-X. Cheng, R.-X. Zhuo and X.-Z. Zhang, *J Mater Chem*, 2012, **22**, 13591-13599.
4. Y.-X. Sun, X.-Z. Zhang, H. Cheng, S.-X. Cheng and R.-X. Zhuo, *Journal of Biomedical Materials Research Part A*, 2008, **84A**, 1102-1110.
